# Supplementary material for: The Effect of Blood Flow-Restricted Low Resistance Training on Microvascular Circulation of Myocardium in Spontaneously Hypertensive Rats
Source: Front Physiol. 2022 Mar 24;13:829718. doi: 10.3389/fphys.2022.829718 (PMC9076488; doi:10.3389/fphys.2022.829718)
Supplement: Supplementary file 1 [file Table1.XLSX]

## Sheet: BW SBP DBP cardica function
	BW Initial																		BW Final
WKY	201.4	200.7	200.6	201.7	201.8	200.9	200.8	201.5	201.6	200.5	201.3	200.4	201	202.4	200.3	200.4			286.5	290.2	288.9	264.2	277	294.2	238.5	281.9	276.1	262.3	279.7	257.8	260.6	284.3	297.5	278
SHR-SED	199.2	199.4	198.8	201.2	200.2	200.8	200.4	199.6	200	201	199.8	200.6	198.6	200.9	198.5	200.8	198.4	201.1	269.3	257.9	267.6	280.9	260.5	240	270	234.7	244.5	276.1	299.8	272.5	280.9	283.6	276.8	254.5	281.4	291.5
HIRT	198.2	198.5	198.8	197.6	197.5	198	197.8	199.5	199.3	197	200	197.3	198.2	199.3	197.4				273.1	302.2	283.1	316.2	261.6	300.3	280.2	297.8	285.8	293.5	304.6	263.4	270.6	291.4	303.5
LIRT	201	201.9	200.9	201.5	201.8	201.2	200.6	199.9	200.4	200.3	201.3	202	200.8	199.8	201.3				274.2	300.6	251.7	252.3	262	302.6	267.3	250	261.9	245.6	278.3	263.9	260.5	272.4	293.3
BFRT	200.9	201.2	200.8	201.4	200.5	200.4	201.7	201.8	201.1	201.5	200.7	200.6	201.6	201.3	201.6	201.7	201		267.8	285.1	255.4	238.6	267.2	246.4	284.7	283.8	252.2	293.8	302.1	309.3	286.4	265.9	234.5	342.2	302.2
	SBP Initial																		SBP Final
WKY	146.92	138	138.67	156.45	173	181.85	140.33	143.33	151.6	158.64	170.46	146.23	163.77	148.94	153.21	134.66			141.33	137.5	173.75	147.67	140.14	134.8	135.22	156.11	149.5	150.75	146.74	145.12	150.9	139.92	143.77	153.61
SHR-SED	161.81	195	171.33	173.56	173.75	175.57	164	182.13	200.5	156.2	111	169.38	183	190.17	169.29	189.77	178.86	189.33	161.17	203.88	163.13	141	162	195.17	170.2	183.07	185.5	166	191.4	196.91	186.18	191.08	186	183.7	213.63	176.31
HIRT	196.88	162.73	177.25	192.38	191.2	170.13	177.18	116.56	163.71	143.18	184.6	184.8	176.2	163.9	175.1				174.5	181.56	188.33	194.14	205.9	199	190	206.29	177	212	160.2	211.33	200.42	191.45	183.2
LIRT	180.08	174.69	164.8	171.73	193.05	179.25	200.11	183.7	186.82	157.27	187.75	152	170	190.13	183.47				170.78	173.13	154.8	165.59	154	163.42	141.6	167.67	181.71	142.36	170.93	127.71	131.4	116.6	154.4
BFRT	174.83	202	172	165.9	186.73	177.23	197.64	174.29	199.5	184.95	160	172.71	162.71	174.29	150.83	160	160		151.33	176.83	150.57	131	128	128.57	158.67	149.33	140.83	192.38	144.2	135.64	110.25	189.42	150.38	131.2	117.4
	DBP Initial																		DBP Final
WKY	68.67	70.5	86.87	68.36	94	87.77	49.67	83.83	46.6	64.86	59.23	61.65	83.44	69.7	80.56	78.1			64.72	71.5	83.75	60.5	66.14	73.4	72.89	49.67	111.5	52.5	86.52	70.43	59.24	66.4	90.91	50.44
SHR-SED	70.94	107.75	66.17	73.56	95.5	81.57	78.25	79.93	53.25	65.9	37.33	96.75	71	86.08	65.57	122.69	84.71	117.5	89.33	96.47	79.13	70.33	81.75	105.5	85.2	108.93	97.25	71.67	91.87	107.36	105.55	102.15	93.25	102.3	138.5	107.77
HIRT	90.94	79.6	101.25	116.63	89.5	79.25	96.18	40.22	112.57	57.09	78.8	132.2	100.45	58.4	109.71				126.25	100	126.67	142	171.5	136.56	105.5	115.57	90.29	153.25	87.2	144.83	102.66	130.53	141.71
LIRT	80.17	110	71.8	95.91	126.32	69.25	107.68	99.7	86.82	79	91	105.75	62	112.39	121.4				73.44	88.88	113.67	82.13	130.71	79.63	75.33	98.11	66.71	77.07	95.53	60.29	60.2	82.8	111.5
BFRT	129	120	68.75	79	96.95	88.38	102.27	89.71	88	119.79	80	72.94	88.64	78.43	65.67	80	80		84.67	81.83	64.29	86.83	58	65.71	83.17	95.67	68.33	88	69.6	53.36	56	80.67	61.92	97.6	68.4
	HR Initial																		HR Final
WKY	296.67	324.66	340.41	389.9	316.44	315.29	320.29	339.85	312.15	354.63	343.27	307.58	372.16	350.52	300.26	302.94			291.86	302.33	334.28	287	309.53	282.56	373.12	350.54	324.25	316.37	348.71	330.61	297.84	319.55	300.26	293.63
SHR-SED	449.32	432.94	390.61	412.11	301.77	323.66	467.51	425.66	340	401	321.3	408.64	442.27	386.53	418.17	393.84	441.88	444.54	293.05	370.82	376.61	366.1	419.81	432.03	407.5	432.36	399.92	440.36	374.08	362.72	445.07	430.74	482.88	460.91	419.61	462.97
HIRT	421.27	416.76	411.01	408.82	408.8	418.23	405.9	399.91	409.82	409.64	399.28	400.45	401.9	428.91	429.28				400.88	402.42	403.15	382.1	388.98	395.6	395.64	393.28	377.45	393.9	409.91	389.82	409.64	389.28	400.54
LIRT	397.37	399.6	395.45	394.67	445.73	443.57	469.41	464.35	434.44	435.57	394.39	428.28	392.46	386.81	451.38				420.56	376.79	456.34	363.37	321.9	410.47	278.6	390.66	341.59	325.33	294.82	347.28	348.11	352.83	399.21
BFRT	412.08	396.17	367.08	431.11	433.16	421.79	417.32	418.94	402.54	409.92	443.89	438.84	410.45	391.05	432.28	409.52	405.66		353.65	379.5	337.79	337.63	370.9	295.12	264.09	302.22	362.75	403.35	335.34	374.41	315.76	339.8	346.14	288.3	296.21
	EF Initial																		EF Final
WKY	71.64	68.97	67.98	70.62	69.12	71.9	68.31	69.88											69.35	73.83	72.26	67.8	68.42	71.28	73.45	70.09
SHR-SED	56.38	63.63	68.16	51.39	59.65	59.1	62.18	58.63											58.93	58.78	56.26	58.83	58.32	64.84	54.61	55.03
HIRT	58.42	57.53	63.22	54.81	59.88	69.65	62.71	58.46											67.76	72.19	63.38	64.69	69.49	71.46	67.34	68.98
LIRT	57.65	56.62	74.95	60.49	54.94	54.59	62.91	60.31											71.44	66.96	76.56	60.39	72.36	66.13	65.72	68.51
BFRT	54.79	64.24	54.96	53.37	52.19	56.41	68.36	60.97	60.4	59.74									69.96	65.57	65.21	68.24	70.82	70.2	68.63	67.93	67.98	69.35
	FS Initial																		FS Final
WKY	42.02	39.68	38.56	41.16	41.24	40.81	39.73	39.64											40.22	43.64	42.34	39.04	36.54	39.72	41.89	47.09
SHR-SED	30.19	35.65	39.32	27.32	32.84	29.46	30.81	39.37											32.48	32.18	30.4	32.16	32.22	32.9	32.1	30
HIRT	31.47	31.04	35.28	29.52	32.81	40.27	33.97	32.83											38.82	42.25	35.25	36.32	40.15	41.84	38.12	40.09
LIRT	31.26	31.04	44.94	33.5	29.47	29.4	35.22	33.55											41.7	38.06	46.44	33.16	42.48	37.42	37.11	39.48
BFRT	29.34	36.65	29.63	28.55	27.79	30.77	39.54	33.88	33.46	33.25									40.29	36.88	36.93	38.9	41.07	40.78	39.47	38.84	38.56	40.22

## Sheet: WB original figure
	WKY	SHR-SED	HIRT	LIRT	BFRT
pi3k/GAPDH	0.177682	0.514677	0.431602	0.372645	1.07333
	0.169444	0.466149	0.586995	0.40188	0.90909
	0.299341	0.535245	0.413138	0.424574	0.957635
	0.295611	0.426472	0.432967	0.545183	0.743139
	0.342733	0.386472	0.510577	0.393251	0.776519
	0.561175	0.476757	0.523245	0.418653	0.623687
	0.796558	0.492316	0.546428	0.536274	0.687487
	0.753087	0.377064	0.526599	0.327594	0.981442
Akt/GAPDH	0.394264	0.141954	0.474935	0.398441	0.456511
	0.336767	0.268571	0.437483	0.362711	0.425343
	0.381452	0.224314	0.445301	0.391043	0.367915
	0.293465	0.198677	0.432018	0.417562	0.379984
	0.314645	0.164232	0.416683	0.283928	0.41228
	0.392461	0.253958	0.42374	0.44976	0.330873
	0.389874	0.150874	0.546863	0.494314	0.460609
	0.42235	0.163348	0.443562	0.482329	0.389172
p-Akt/GAPDH	0.117246	0.101692	0.237461	0.143068	0.234216
	0.192618	0.126466	0.195304	0.129429	0.198751
	0.164038	0.091805	0.262586	0.075766	0.273292
	0.097211	0.173764	0.226264	0.109158	0.229887
	0.193628	0.139547	0.172239	0.117473	0.174585
	0.178254	0.112499	0.211667	0.090538	0.21761
	0.1286	0.126153	0.204533	0.076963	0.181658
	0.155821	0.104579	0.213609	0.082828	0.224872
eNos/GAPDH	0.794735	0.497953	0.705335	1.06835	0.996961
	0.648344	0.534623	0.890835	0.685776	1.41893
	0.707443	0.518495	0.453883	0.649074	1.88721
	0.729811	0.480928	0.261015	0.753714	1.34296
	0.527259	0.536506	0.399759	0.534441	1.09103
	0.653538	0.361988	0.456582	0.984374	0.674629
	0.626032	0.38922	0.309646	0.706553	1.74557
	0.67104	0.456849	0.497877	0.523883	0.986707
p-Akt/Akt	0.364587	0.299771	0.273582	0.369846	0.266155
	0.457563	0.470883	0.315632	0.469546	0.585631
	0.259173	0.202233	0.227852	0.223548	0.568645
	0.541866	0.370883	0.361655	0.234384	0.369885
	0.317895	0.645652	0.477895	0.199146	0.837564
	0.419532	0.199771	0.412654	0.304693	0.597565
	0.247896	0.545652	0.443594	0.189872	0.733546
	0.317202	0.202233	0.298569	0.168965	0.418153
VEGF/GAPDH	1.91667	0.750723	1.75544	1.85352	1.27378
	2.48056	0.697135	0.935653	1.70175	1.59139
	1.76189	0.650863	1.05757	2.56395	1.82416
	1.60379	0.714366	1.93483	3.33049	2.41254
	1.81977	0.657423	1.37848	3.39535	2.17064
	1.26625	0.636522	1.52902	2.33049	2.72025
	2.02491	0.718532	1.30559	2.39535	2.04971
	1.76522	0.612964	1.26357	2.08813	1.94787
VEGFR2/GAPDH	0.621149	0.471727	0.834119	1.0427	0.793161
	0.642187	0.653048	0.835374	1.11453	0.868022
	1.05344	0.815236	0.907421	0.837359	1.1596
	0.819797	1.06482	1.00795	0.966085	1.57218
	0.908705	0.900856	0.840436	1.26468	0.720381
	1.16515	1.00678	1.19272	0.811187	0.941119
	1.0156	0.897276	1.16645	1.11979	1.27099
	1.19726	0.918456	0.94969	1.19838	1.43189
p-VEGFR2/GAPDH	0.116316	0.0437232	0.215925	0.275657	0.20038
	0.0847202	0.0340528	0.121547	0.140791	0.095781
	0.0986993	0.0311134	0.10691	0.453372	0.200586
	0.0507655	0.0305326	0.129556	0.430993	0.179678
	0.0931731	0.0514986	0.195517	0.410701	0.136059
	0.103733	0.0433972	0.202798	0.245932	0.187174
	0.0426806	0.062607	0.15532	0.332586	0.257371
	0.100847	0.0322516	0.0894194	0.367003	0.295789
p-eNOS/GAPDH	0.535572	0.0904171	0.24087	0.48922	0.575852
	0.298191	0.0375837	0.211186	0.489203	0.444426
	0.463412	0.0231382	0.0613043	0.469837	0.467552
	0.513651	0.022716	0.0625669	0.428581	0.561781
	0.425914	0.024297	0.0879285	0.220921	0.302724
	0.172096	0.0153382	0.172835	0.251903	0.312552
	0.198003	0.0346161	0.0693935	0.317507	0.429643
	0.359178	0.0580379	0.100064	0.267003	0.438491
p-VEGFR2/VEGFR2	0.18726	0.0926876	0.258866	0.264369	0.252634
	0.131924	0.0521444	0.145499	0.126323	0.110344
	0.0936924	0.0381649	0.117817	0.541431	0.172978
	0.0619245	0.0286739	0.128535	0.446123	0.114286
	0.102534	0.0571663	0.232638	0.324747	0.188871
	0.0890295	0.0431049	0.17003	0.303175	0.198885
	0.0420249	0.0697745	0.133156	0.297007	0.202497
	0.0842314	0.035115	0.0941565	0.30625	0.206573
p-eNOS/eNOS	0.23857	0.040759	0.0370814	0.119948	0.402741
	0.223806	0.0141306	0.030432	0.258705	0.559606
	0.18987	0.0077499	0.0079797	0.186744	0.446165
	0.30383	0.00838684	0.018991	0.182664	0.443907
	0.340371	0.0086978	0.0394275	0.129768	0.390786
	0.142595	0.00830841	0.0631953	0.188232	0.300444
	0.145006	0.0189073	0.0298006	0.178692	0.557472
	0.0985061	0.0218065	0.0360603	0.172685	0.52649

## Sheet: Immunofluorescence staining
							WKY			SHR-SED			HIRT			LIRT			BFRT
							IOD	AREA	areal density	IOD	AREA	areal density	IOD	AREA	areal density	IOD	AREA	areal density	IOD	AREA	areal density
							3389.13	1474560	0.0023	1428.24	1474560	0.00097	2257.5	1474560	0.00153	4879.72	1474560	0.00331	2529.46	1474560	0.00172
							2720.01	1474560	0.00184	1051.33	1474560	0.00071	2262.76	1474560	0.00153	4625.98	1474560	0.00314	3091.57	1474560	0.0021
							1437.26	1474560	0.00097	1169.18	1474560	0.00079	1927.01	1474560	0.00131	1464.77	1474560	0.00099	2072.15	1474560	0.00141
							1831.44	1474560	0.00124	3787.79	1474560	0.00257	1404	1474560	0.00095	3534.12	1474560	0.0024	2688.27	1474560	0.00182
							648.199	1474560	0.00044	3582.7	1474560	0.00243	1170.94	1474560	0.00079	2498.55	1474560	0.00169	2556.06	1474560	0.00173
							3323.31	1474560	0.00225	5507.17	1474560	0.00373	1782.78	1474560	0.00121	3045.82	1474560	0.00207	1896.23	1474560	0.00129
							4249.65	1474560	0.00288	1432.96	1474560	0.00097	3171.72	1474560	0.00215	1123.76	1474560	0.00076	2331.7	1474560	0.00158
							1761.36	1474560	0.00119	1782.94	1474560	0.00121	2549.45	1474560	0.00173	1634	1474560	0.00111	2486.05	1474560	0.00169
							3093.17	1474560	0.0021	1609.35	1474560	0.00109	3249.47	1474560	0.0022	1005.45	1474560	0.00068	3505.6	1474560	0.00238
							2273.09	1474560	0.00154	777.109	1474560	0.00053				2363.39	1474560	0.0016
										1135.17	1474560	0.00077				2135.33	1474560	0.00145
										961.054	1474560	0.00065				2187.99	1474560	0.00148

## Sheet: VEGF of blood
WKY	SHR-SED	HIRT	LIRT	BFRT			Standard Curve（pg/L）	240	160	80	40	20	blank
93.9216	80.1961	308.92	224.314	139.02			OD1	1.467	0.854	0.695	0.358	0.242	0.083
106.221	99.8039	417.25	129.216	156.667			OD2	1.395	0.887	0.669	0.373	0.251	0.075
97.625	166.471	312.62	78.2353	143.922			average OD	1.431	0.8705	0.682	0.3655	0.2465	0.079
120.72	112.549	405.96	73.3333	121.373			calibration OD	1.352	0.7915	0.603	0.2865	0.1675
140.98	144.608	302.66	196.863	128.235
66.4706	158.627	346.64	201.765	152.745
73.3333	187.941	245.73	151.765	176.275
94.902	137.046	381.46	137.059	141.961
86.73	129.773	411.44	148.824	127.059
145.882	101.765	448.2	82.1569	182.098
139.02	128.235	300.35	178.235	157.588
101.229	92.9412	367.46	108.627	136.77
109.825	117.582	375.42	129.216	149.339
75.2941	124.855	389.122	173.333	157.603

## Sheet: Immunohistochemical
CD31 immunostaining intensity (IOD)						MVD （counts/mm2）
WKY	SHR-SED	HIRT	LIRT	BFRT		WKY	SHR-SED	HIRT	LIRT	BFRT
417	390	512	508	470		95	102	96	106	124
370	244	237	214	431		102	79	70	112	125
405	214	436	421	314		90	52	90	82	117
592	433	252	438	537		105	88	78	107	118
517	290	412	408	370		102	78	85	122	86
470	344	437	414	431		117	96	79	102	110
405	314	472	385	414		100	22	80	104	90
392	333	452	432	437		113	25	90	92	107
						81	39	88	85	85
						105	82	80	94	105
						122	73	90	77	122
						126	72	98	74	94
